# Supplementary material
Source: Springer Nature journal article supplement (https://www.springermedizin.de/resource/supplementary/12906_2006_117_MOESM1_ESM.pdf/9524086)

## Changes in Stress in Moderately vs. Highly Compliant Meditators

PSS Score

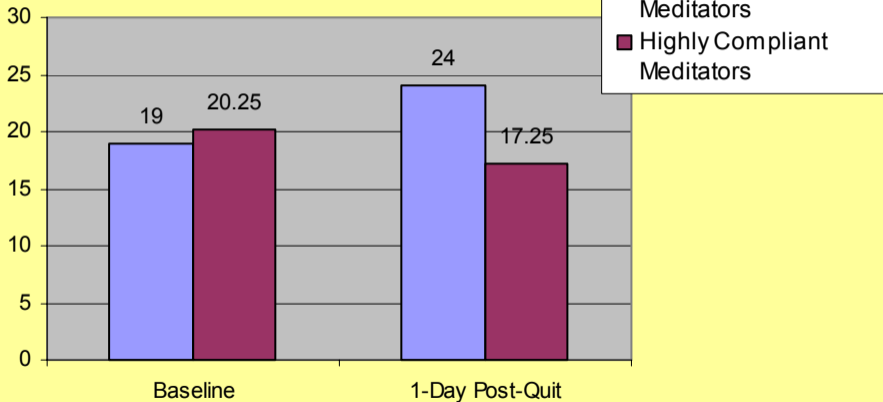

Supplement: MOESM1 [file 9524086]
